# Supplementary material for: Beyond the visual: using metabarcoding to characterize the hidden reef cryptobiome
Source: Proc Biol Sci. 2019 Feb 13;286(1896):20182697. doi: 10.1098/rspb.2018.2697 (PMC6408595; doi:10.1098/rspb.2018.2697)
Supplement: Table S2 [file rspb20182697supp7.xlsx]

## Sheet: PearmanetalTableS2
Carvalho et al., Beyond the visual: using metabarcoding to characterize the hidden reef cryptobiome, Proceedings of the Royal Society B, doi:10.1098/rspb.2018.2697
Table S2: Proportion of reads and OTU’s per phyla
	Total		Sessile		Mobile
Phyla	Reads	OTUs	Reads	OTUs	Reads	OTUs
Annelida	16.83	4.85	9.68	5.49	21.8	3.67
Arthropoda	16.3	35.59	12.26	33.96	20.37	37.76
Ascomycota	0	0.03	0	0.02	0	0
Bryozoa	5.61	0.59	10.81	0.72	0	0
Chaetognatha	0	0	0	0	0	0.01
Chlorophyta	0	0	0	0	0	0
Chordata	13.8	5.34	14.21	6.18	14.41	4.84
Cnidaria	5.5	0.89	9.53	1.06	1.96	0.53
Echinodermata	2.4	1.13	0.83	1.06	3.32	0.98
Hemichordata	0	0.03	0	0.03	0	0.03
Heterokontophyta	0	0.01	0	0	0	0
Mollusca	2.57	3.13	3.33	2.98	2.25	2.82
Nematoda	0.06	0.21	0.03	0.23	0.08	0.15
Nemertea	1.17	0.25	1.32	0.29	1.23	0.16
Platyhelminthes	0.14	0.28	0.03	0.26	0.21	0.29
Porifera	2.79	1.03	7.43	1.45	0	0
Pyrrophycophyta	0	0.01	0	0	0	0
Rhodophyta	3.19	0.77	3.05	0.79	0	0
Rotifera	0	0.12	0	0.09	0.01	0.14
Sipuncula	0.77	0.3	1.2	0.38	0.67	0.21
Unclassified	28.89	45.44	26.28	45	33.7	48.4
